# Supplementary material for: Cathodic electrochemical deposition: a new strategy to enhance the activity and stability of silver cathodes for thin-film solid oxide fuel cells
Source: Royal Society of Chemistry journal article supplement (doi:10.1039/d0ta02439b), 2020-01-01
Supplement: d0ta02439b1.pdf [file d0ta02439b1.pdf]

**Electronic Supplementary Information (ESI)**

**Cathodic Electrochemical Deposition: A New Strategy to Enhance the Activity and Stability of Silver Cathodes for Thin-film Solid Oxide Fuel Cells**

Hyunseung Kim <sup>a</sup>, Han Gil Seo <sup>a,b</sup>, Yoonseok Choi <sup>a,c</sup>, Dae-Kwang Lim <sup>a</sup>, and WooChul Jung\*<sup>a</sup>

a. Department of Materials Science and Engineering, Korea Advanced Institute of Science and Technology (KAIST), 291 Daehak-ro, Yuseong-gu, Daejeon 34141, Republic of Korea. E-mail: wchung@kaist.ac.kr; Fax: +82-42-350-3310; Tel: +82-42-350-3314

b. Current address: Department of Materials Science and Engineering, Massachusetts Institute of Technology (MIT), 77 Massachusetts Avenue Cambridge, Massachusetts 02139, USA.

c. Current address: Korea Institute of Energy Research, Daejeon 34129, Republic of Korea.

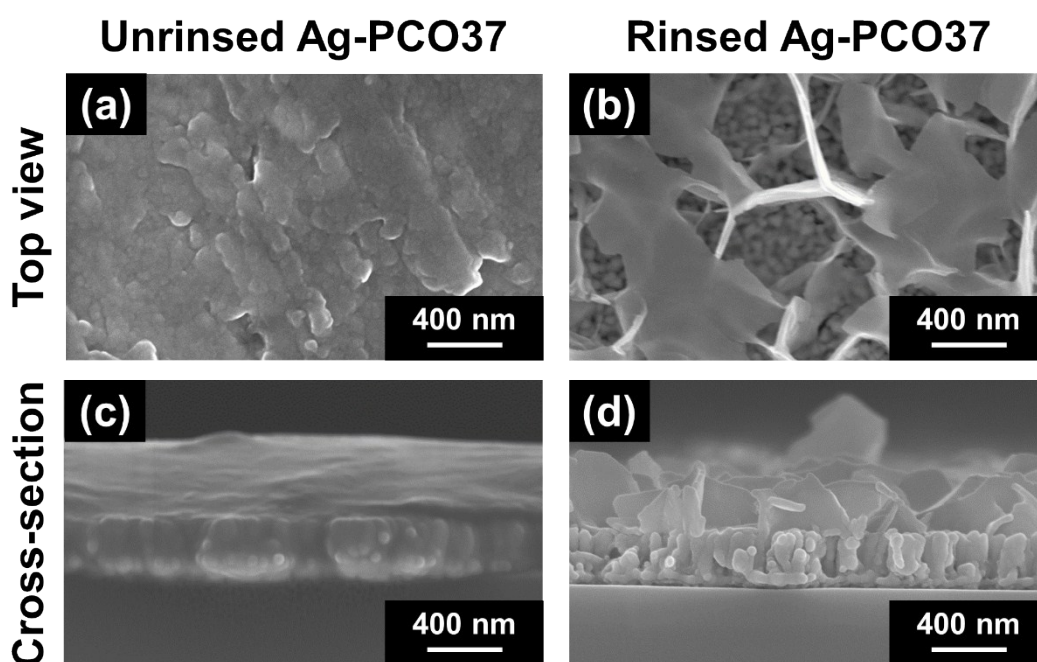

**Figure S1.** (a, b) Top-view and (c, d) cross-section SEM images of CELD-treated and (a, c) unrinsed Ag-PCO37 film and (b, d) Ag-PCO37 film rinsed with deionized water

**Table S1.** ICP-OES compositional analysis of the CELD-treated PCO films deposited at an applied potential of -0.5 V versus saturated calomel electrode for a deposition time of 300 s.

| % of Pr in CELD bath | 10             | 15             | 20             |
|----------------------|----------------|----------------|----------------|
| at% of Pr in film    | $15.5 \pm 0.4$ | $20.7 \pm 1.1$ | $28.1 \pm 0.5$ |

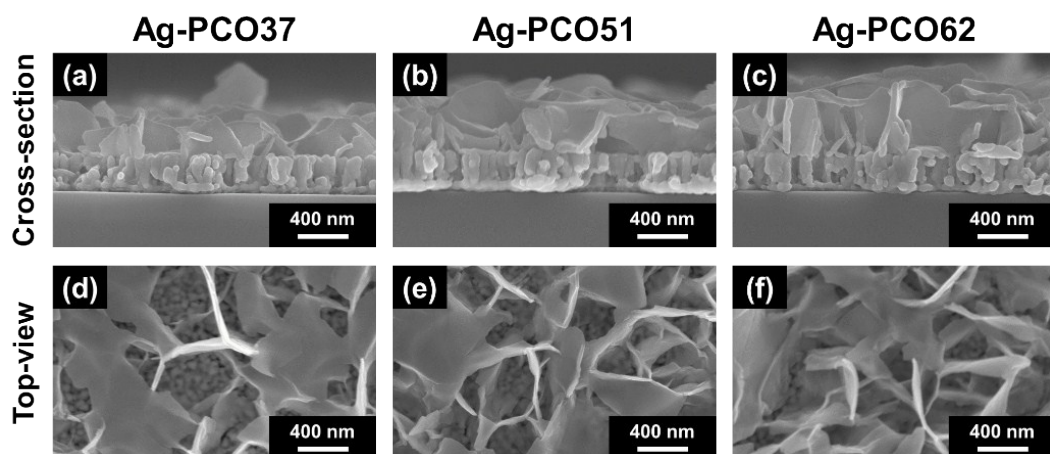

**Figure S2.** The (a-c) cross-section and (d-f) top-view SEM images of (a, d) Ag-PCO37, (b, e) Ag-PCO51, and (c, f) Ag-PCO62 films.

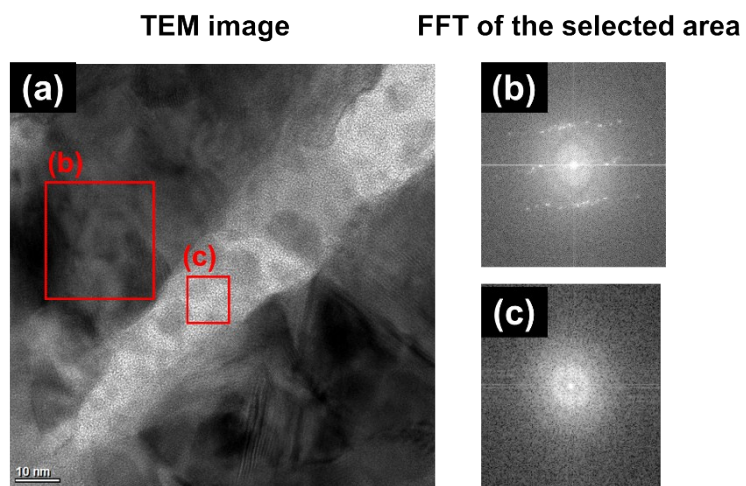

**Figure S3.** (a) Cross-section TEM image of PCO-coated Ag film, (b, c) fast Fourier transformation results of the selected area shown in (a)

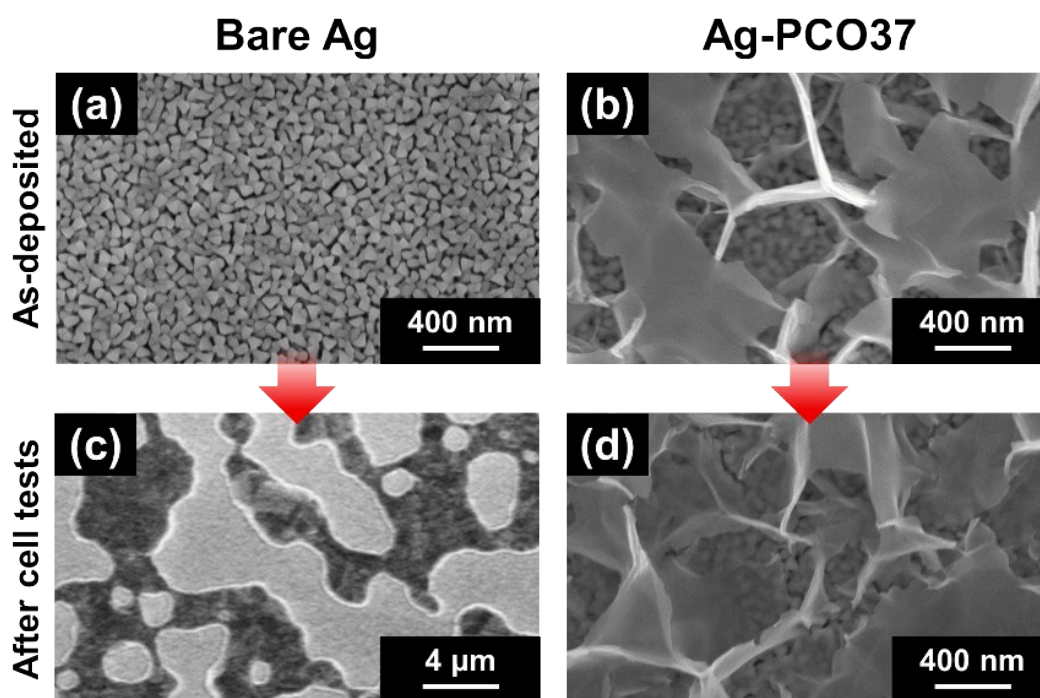

**Figure S4.** The top-view SEM images of the (a, c) bare Ag and (b, d) Ag-PCO37 films (a, b) as-deposited and (c, d) after the cell tests.

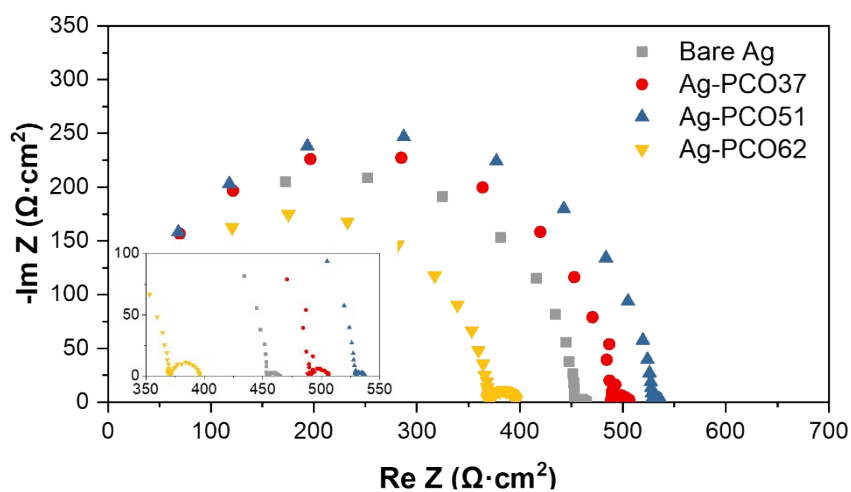

**Figure S5.** Full AC impedance spectra of the symmetric cells (bare Ag, Ag-PCO37, Ag-PCO51, Ag-PCO62) obtained at 450 °C while maintaining the oxygen partial pressure at 0.21 atm (frequency sweep = 2 MHz to 10 mHz)
